# Supplementary material for: Metal ion assisted interface re-engineering of a ferritin nanocage for enhanced biofunctions and cancer therapy
Source: Royal Society of Chemistry journal article supplement (doi:10.1039/c7nr08188j), 2017-12-12
Supplement: c7nr08188j1.pdf [file c7nr08188j1.pdf]

## Supporting Information

### **Metal Ion Assisted Interface Re-engineering of Ferritin Protein Nanocage for Enhanced Biofunctions and Cancer Therapy**

Zhantong Wang<sup>a,b,†</sup>, Yunlu Dai<sup>a,†</sup>, Zhe Wang<sup>a,\*</sup>, Orit Jacobson<sup>a</sup>, Fuwu Zhang<sup>a</sup>, Bryant C. Yung<sup>a</sup>, Pengfei Zhang<sup>b</sup>, Haiyan Gao<sup>b</sup>, Gang Niu<sup>a</sup>, Gang Liu<sup>b,\*</sup>, Xiaoyuan Chen<sup>a,\*</sup>

a. Laboratory of Molecular Imaging and Nanomedicine, National Institute of Biomedical Imaging and Bioengineering, National Institutes of Health, Bethesda, Maryland 20892, United States.

b. State Key Laboratory of Molecular Vaccinology and Molecular Diagnostics & Center for Molecular Imaging and Translational Medicine, School of Public Health, Xiamen University, Xiamen 361102, China.

<sup>†</sup>These authors contributed equally to this work.

\*Corresponding authors: Xiaoyuan Chen: [Shawn.chen@nih.gov](mailto:Shawn.chen@nih.gov); Zhe Wang: [zhe.wang2@nih.gov](mailto:zhe.wang2@nih.gov); Gang Liu: [gangliu.cmitm@xmu.edu.cn](mailto:gangliu.cmitm@xmu.edu.cn).

## Primers used in this study

Mutant A primers:

| Primer | Sequence (5'-3')                                                                                             |
|--------|--------------------------------------------------------------------------------------------------------------|
| MuA1-F | accagcgaggtggacgaatcttctgcaggatataaagaaacctgaccgtgatgactggg                                                  |
| MuA1-R | tagtgactgattcacactctttccaagtgcagtgcacactccattgcattcagcccgtctcccagtcacag                                      |
| MuA2-F | atctcatgaagagCATgaacatgctCATaaactgatgaagctgcagaaccagcgaggtgg                                                 |
| MuA2-R | tcttgcagtagccagttgtgaagtccagtagtgactgattcac                                                                  |
| MuA3-F | cgggatgatgtggcctgaagaactttgccaaatactttCATcatcaatctcatgaagag                                                  |
| MuA3-R | tcattcaggaatgcgtctcaatgaagtcacataagtggggatcattcttgcagtagcc                                                   |
| MuA4-F | agttgatgcctcctacgtctatctgtccatgtcttgttattttgaccgggatgatgtgg                                                  |
| MuA4-R | gtaagttggtcacgtggtcaccagttctttaatggattcacctgctcattcaggtaats                                                  |
| MuA5-F | catgccatgggcaccaccgcgtctccctcgcaagtgcgccagaactaccaccaggactcggaggctgccatcaaccgcca<br>gatcaacctggagttgtatgcctc |
| MuA5-R | cggctcgagttagctctcatcaccgtgtcccagggtgtgcttgtcaaagagatattctgccatgccagattcaggggctccat<br>cttgcgtaagttggtcacg   |

Mutant B primers:

| Primer | Sequence (5'-3')                                                                                             |
|--------|--------------------------------------------------------------------------------------------------------------|
| MuB1-F | accagcgaggtggacgaatcttctgcaggatataaagaaacctgaccgtgatgactggg                                                  |
| MuB1-R | tagtgactgattcacactctttccaagtgcagtgcacactccattgcattcagcccgtctcccagtcacag                                      |
| MuB2-F | atctcatgaagagaggggaacatgctCATaaactgatgCATctgcagaaccagcgaggtgg                                                |
| MuB2-R | tcttgcagtagccagttgtgaagtccagtagtgactgattcac                                                                  |
| MuB3-F | cgggatgatgtggcctgaagaactttCATaaatactttCATcatcaatctcatgaagag                                                  |
| MuB3-R | tcattcaggaatgcgtctcaatgaagtcacataagtggggatcattcttgcagtagcc                                                   |
| MuB4-F | agttgatgcctcctacgtctatctgtccatgtcttgttattttgaccgggatgatgtgg                                                  |
| MuB4-R | gtaagttggtcacgtggtcaccagttctttaatggattcacctgctcattcaggtaat                                                   |
| MuB5-F | Catgccatgggcaccaccgcgtctccctcgcaagtgcgccagaactaccaccaggactcggaggctgccatcaaccgc<br>cagatcaacctggagttgtatgcctc |
| MuB5-R | Cggctcgagttagctctcatcaccgtgtcccagggtgtgcttgtcaaagagatattctgccatgccagattcaggggctccc<br>atcttgcgtaagttggtcacg  |

Mutant C primers:

| Primer | Sequence (5'-3')                                                        |
|--------|-------------------------------------------------------------------------|
| MuC1-F | accagcgaggtggacgaatcttctgcaggatataaagaaacctgaccgtgatgactggg             |
| MuC1-R | tagtgactgattcacactctttccaagtgcagtgcacactccattgcattcagcccgtctcccagtcacag |
| MuC2-F | atctcatgaagagaggggaacatgctgagaaactgatgaagctgcagaaccagcgaggtgg           |

|        |                                                                                                             |
|--------|-------------------------------------------------------------------------------------------------------------|
| MuC2-R | tcttgcagtagccagtttgaagttccagtagtgactgattcac                                                                 |
| MuC3-F | cgggatgatgtggccctgaagaactttgccaaatactttccatcaatctcatgaagag                                                  |
| MuC3-R | tcATGcaggtaatgcgtctcaatgaagtcacataagtggggatcattcttgcagtagcc                                                 |
| MuC4-F | agttgtatgcctcctacgtctatctgtccatgtcttgtattttgaccgggatgatgtgg                                                 |
| MuC4-R | gtaagttggtcacgtgATGaccagttcATGaatggaATGcacctgctcATGcaggtaat                                                 |
| MuC5-F | catgccatgggcaccaccgcgctcctcgcgaagtgcgccagaactaccaccaggactcggaggctgccatcaaccgc<br>cagatcaacctggagttgtatgcctc |
| MuC5-R | cggctcgagttagctctcatcaccgtgtcccagggtgtgcttgtcaaagagatattctgccatgccagattcaggggctccc<br>atcttgcgtaagttggtcacg |

### PCR conditions

| Steps          | 1                                     | 2                                     | 3                                     | 4                                     | 5                                     |
|----------------|---------------------------------------|---------------------------------------|---------------------------------------|---------------------------------------|---------------------------------------|
| <b>Primers</b> | MuA(B or C)1-<br>F, MuA(B or<br>C)1-R | MuA(B or C)2-<br>F, MuA(B or<br>C)2-R | MuA(B or C)3-<br>F, MuA(B or<br>C)3-R | MuA(B or C)4-<br>F, MuA(B or<br>C)4-R | MuA(B or C)5-<br>F, MuA(B or<br>C)5-R |

For specific PCR procedure, five rounds PCR are as follows:

| Cycle number | Denaturation   | Annealing     | Extension      | Final extension |
|--------------|----------------|---------------|----------------|-----------------|
| 1            | 2 min at 95 °C |               |                |                 |
| 2-19         | 30 s at 95 °C  | 30 s at 58 °C | 1 min at 72 °C |                 |
| 20           |                |               |                | 10 min at 72 °C |

**Table S1.** Computational calculation of interface interacting atoms and areas between two nearby ferritin subunits in ferritin variants.

|             | Structure 1 |                 |                  |                        | Structure 2 |                 |                  |                        | Interface area, Å <sup>2</sup> |
|-------------|-------------|-----------------|------------------|------------------------|-------------|-----------------|------------------|------------------------|--------------------------------|
|             | Range       | N <sub>at</sub> | N <sub>res</sub> | Surface Å <sup>2</sup> | Range       | N <sub>at</sub> | N <sub>res</sub> | Surface Å <sup>2</sup> |                                |
| <b>MutA</b> | A           | 154             | 37               | 9617                   | B           | 159             | 36               | 9617                   | 1478.6                         |
| <b>MutB</b> | A           | 163             | 35               | 9360                   | B           | 160             | 39               | 9338                   | 1509.9                         |
| <b>MutC</b> | A           | 142             | 36               | 9384                   | B           | 137             | 36               | 9384                   | 1285.3                         |
| <b>Fn</b>   | A           | 128             | 32               | 9373                   | B           | 150             | 36               | 9367                   | 1297.7                         |

MutA: Mutant A ferritin; MutB: Mutant B ferritin; MutC: Mutant C ferritin; Fn: Ferritin

<sup>i</sup>N<sub>at</sub> indicates the number of interfacing atoms in the corresponding structure.

<sup>i</sup>N<sub>res</sub> indicates the number of interfacing residues in the corresponding structure.

**Surface Å<sup>2</sup>** is the total solvent accessible surface area in square Ångstroms.

**Interface area** in Å<sup>2</sup>, calculated as difference in total accessible surface areas of isolated and interfacing structures divided by two.

**Table 2.** Titration of  $^{64}\text{Cu}^{2+}$  incorporation ratio in ferritin variants

|           | <b>Cu<sup>2+</sup> concentration<br/>(<math>\mu\text{M}</math>)</b> | <b>1</b>                          | <b>10</b>                        | <b>50</b>                         | <b>100</b>                       | <b>1000</b>                       |
|-----------|---------------------------------------------------------------------|-----------------------------------|----------------------------------|-----------------------------------|----------------------------------|-----------------------------------|
| Mutant A  | <b>Labeling yield (%)</b>                                           | <b>100</b>                        | <b>91.15<math>\pm</math>0.55</b> | <b>23.95<math>\pm</math>12.89</b> | <b>20.16<math>\pm</math>3.76</b> | <b>2.66<math>\pm</math>2.33</b>   |
|           | <b>Number of binding sites per ferritin</b>                         | <b>N/A</b>                        | <b>8.09<math>\pm</math>2.33</b>  | <b>10.05<math>\pm</math>8.5</b>   | <b>18.44<math>\pm</math>7.43</b> | <b>18.14<math>\pm</math>13.04</b> |
|           | <b>Cu<sup>2+</sup> concentration<br/>(<math>\mu\text{M}</math>)</b> | <b>1</b>                          | <b>10</b>                        | <b>50</b>                         | <b>100</b>                       | <b>1000</b>                       |
| Mutant B  | <b>Labeling yield (%)</b>                                           | <b>100</b>                        | <b>92.74<math>\pm</math>1.96</b> | <b>32.11<math>\pm</math>2.2</b>   | <b>14.49<math>\pm</math>3.76</b> | <b>1.89<math>\pm</math>0.32</b>   |
|           | <b>Number of binding sites per ferritin</b>                         | <b>N/A</b>                        | <b>9.83<math>\pm</math>0.2</b>   | <b>17.02<math>\pm</math>1.17</b>  | <b>15.36<math>\pm</math>3.99</b> | <b>20<math>\pm</math>3.44</b>     |
|           | <b>Cu<sup>2+</sup> concentration<br/>(<math>\mu\text{M}</math>)</b> | <b>1</b>                          | <b>10</b>                        | <b>50</b>                         | <b>100</b>                       | <b>1000</b>                       |
| Mutant C  | <b>Labeling yield (%)</b>                                           | <b>31.79<math>\pm</math>10.33</b> | <b>5.8<math>\pm</math>0.82</b>   | <b>2.37<math>\pm</math>0.85</b>   | <b>0</b>                         | <b>0</b>                          |
|           | <b>Number of binding sites per ferritin</b>                         | <b>0.17<math>\pm</math>0.05</b>   | <b>0.31<math>\pm</math>0.04</b>  | <b>0.63<math>\pm</math>0.23</b>   | <b>N/A</b>                       | <b>N/A</b>                        |
|           | <b>Cu<sup>2+</sup> concentration<br/>(<math>\mu\text{M}</math>)</b> | <b>1</b>                          | <b>10</b>                        | <b>50</b>                         | <b>100</b>                       | <b>1000</b>                       |
| Native Fn | <b>Labeling yield (%)</b>                                           | <b>26.67<math>\pm</math>10.53</b> | <b>5.33<math>\pm</math>0.94</b>  | <b>2.17<math>\pm</math>0.26</b>   | <b>0</b>                         | <b>0</b>                          |
|           | <b>Number of binding sites per ferritin</b>                         | <b>0.21<math>\pm</math>0.03</b>   | <b>0.46<math>\pm</math>0.13</b>  | <b>0.94<math>\pm</math>0.24</b>   | <b>N/A</b>                       | <b>N/A</b>                        |
|           | <b>Cu<sup>2+</sup> concentration<br/>(<math>\mu\text{M}</math>)</b> | <b>1</b>                          | <b>10</b>                        | <b>50</b>                         | <b>100</b>                       | <b>1000</b>                       |

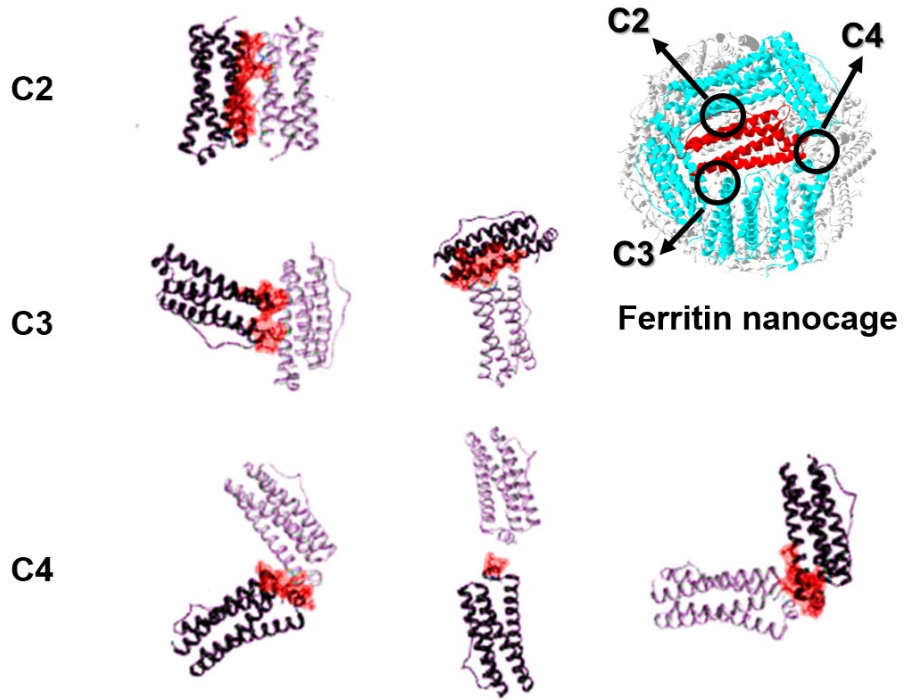

**Figure S1.** Six inter-subunit interfaces of ferritin heavy chain as shown in red color. C2, C3, C4 interfaces are highlighted with black circles.

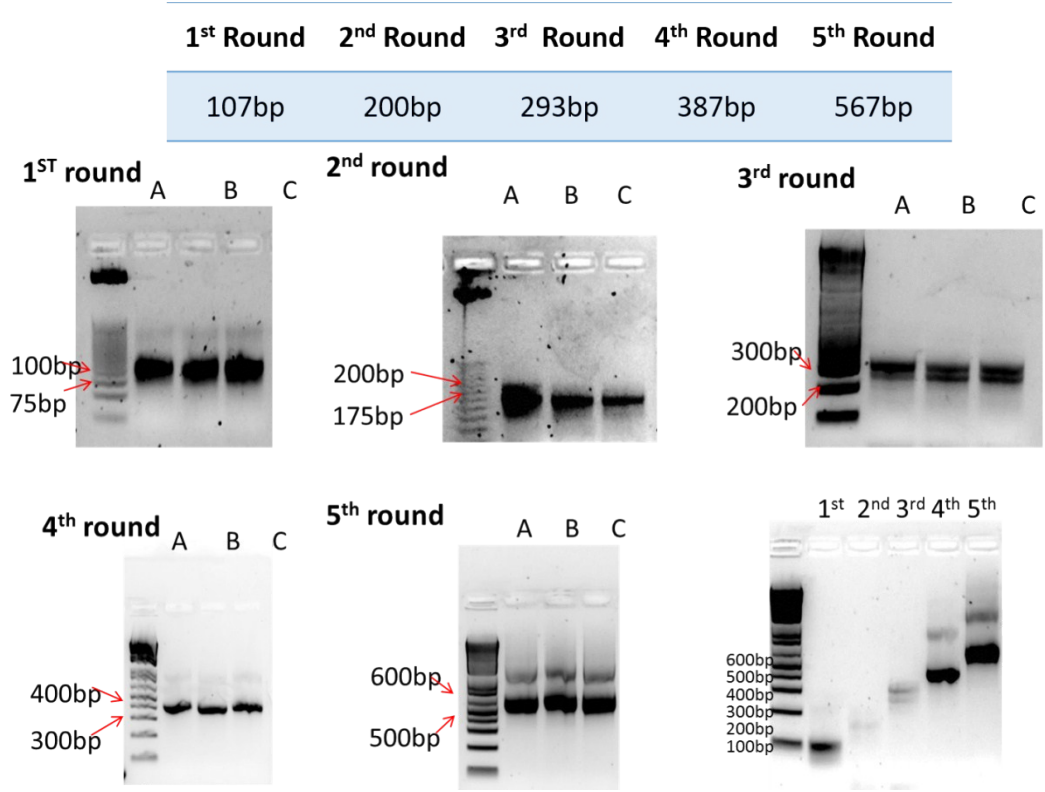

**Figure S2.** Step-wise site-directed mutagenesis of native ferritin. 1% agarose gels were used in the entire experiment.

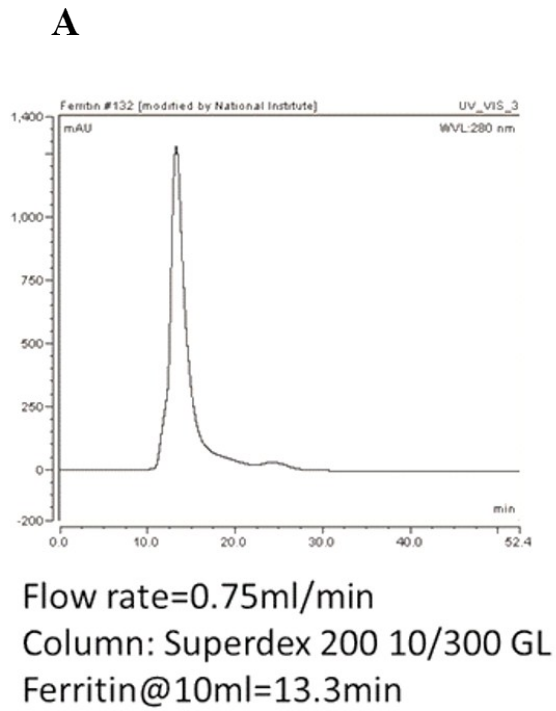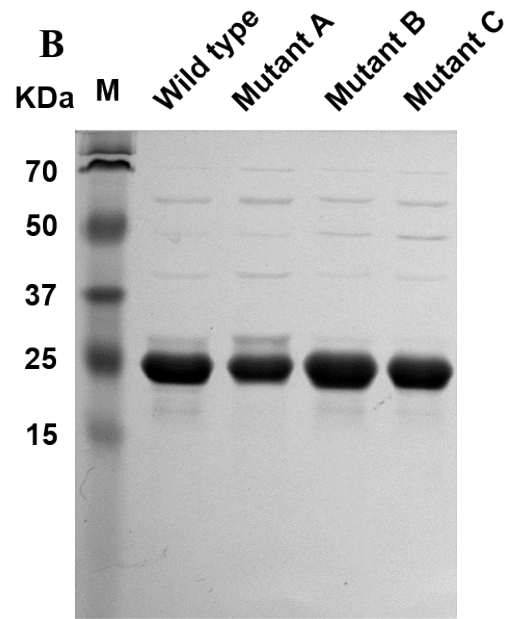

**Figure S3.** (A) GPC purification of expressed ferritin variants. (B) SDS-PAGE analysis of purified ferritin variants. The dark band below 25KDa is the monomer, and other bands above 25KDa are multimers.



Buffer change (Sodium acetate)

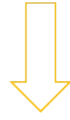

Reducing agent (Sodium dithionite) and Chelator (2,2'-bipyridine)

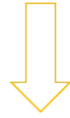

Buffer change (Sodium acetate)

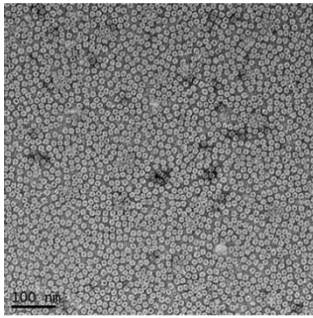

**w/ Uranyl acetate**

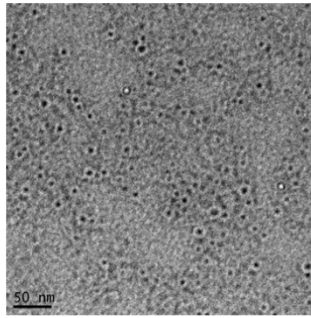

**w/o Uranyl acetate**

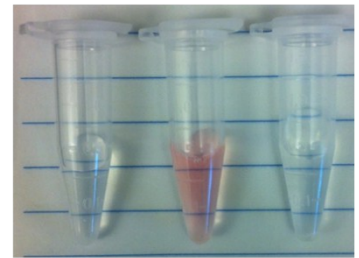

**Figure S4.** Procedure and images of metal ion removal from purified ferritins for subsequent  $^{64}\text{Cu}^{2+}$  labeling.

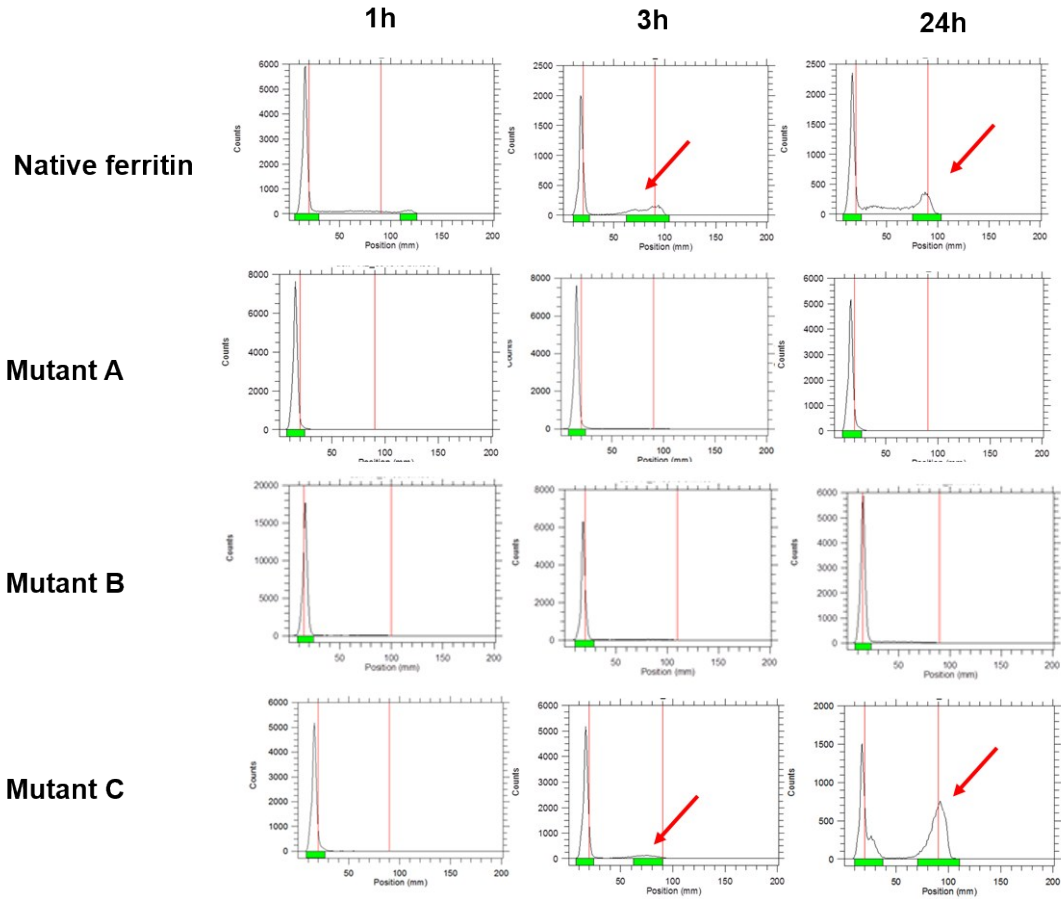

Figure S5. TLC analysis of the stability of  $^{64}\text{Cu}^{2+}$  coordination in ferritin variants in mouse serum.

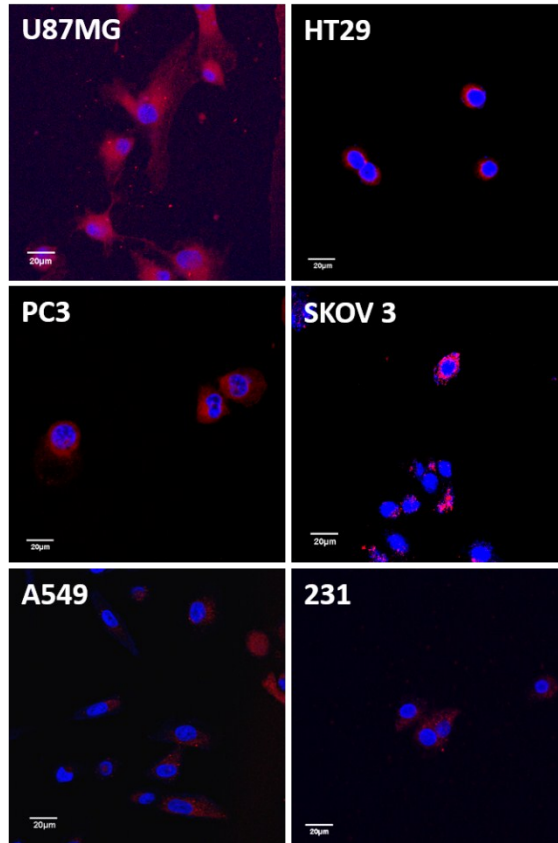

**Figure S6.** Uptake of Cy5.5 labeled ferritin nanoprobe (mutant B) by different cancer cells. Cell nucleus are counterstained with DAPI. Scale bar: 20µm.

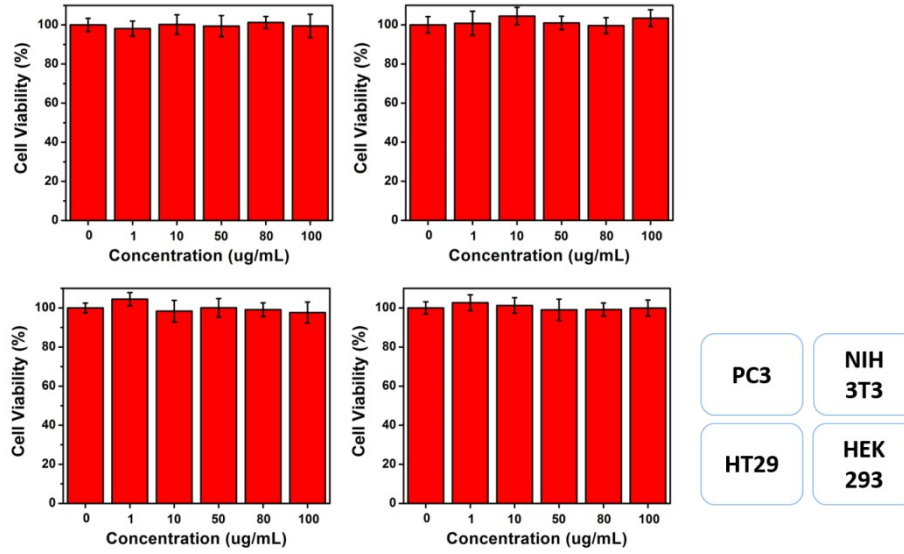

**Figure S7.** MTT assay of mutant B ferritin nanoprobe in different cancer cells (n=6).

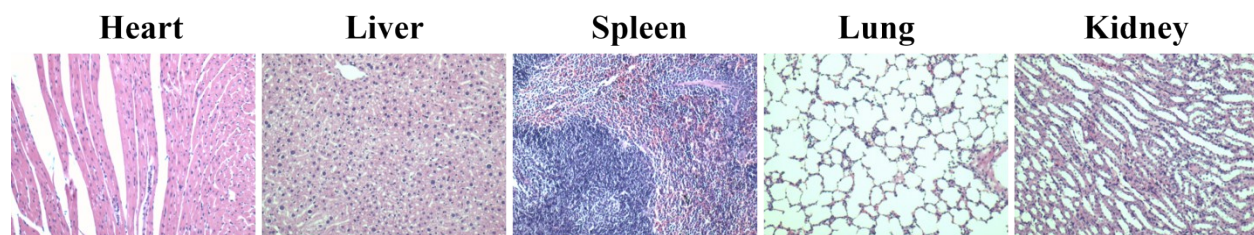

**Figure S8.** H&E staining of major organs after injection of the free ferritin nanoprobe (mutant B) in PET imaging.

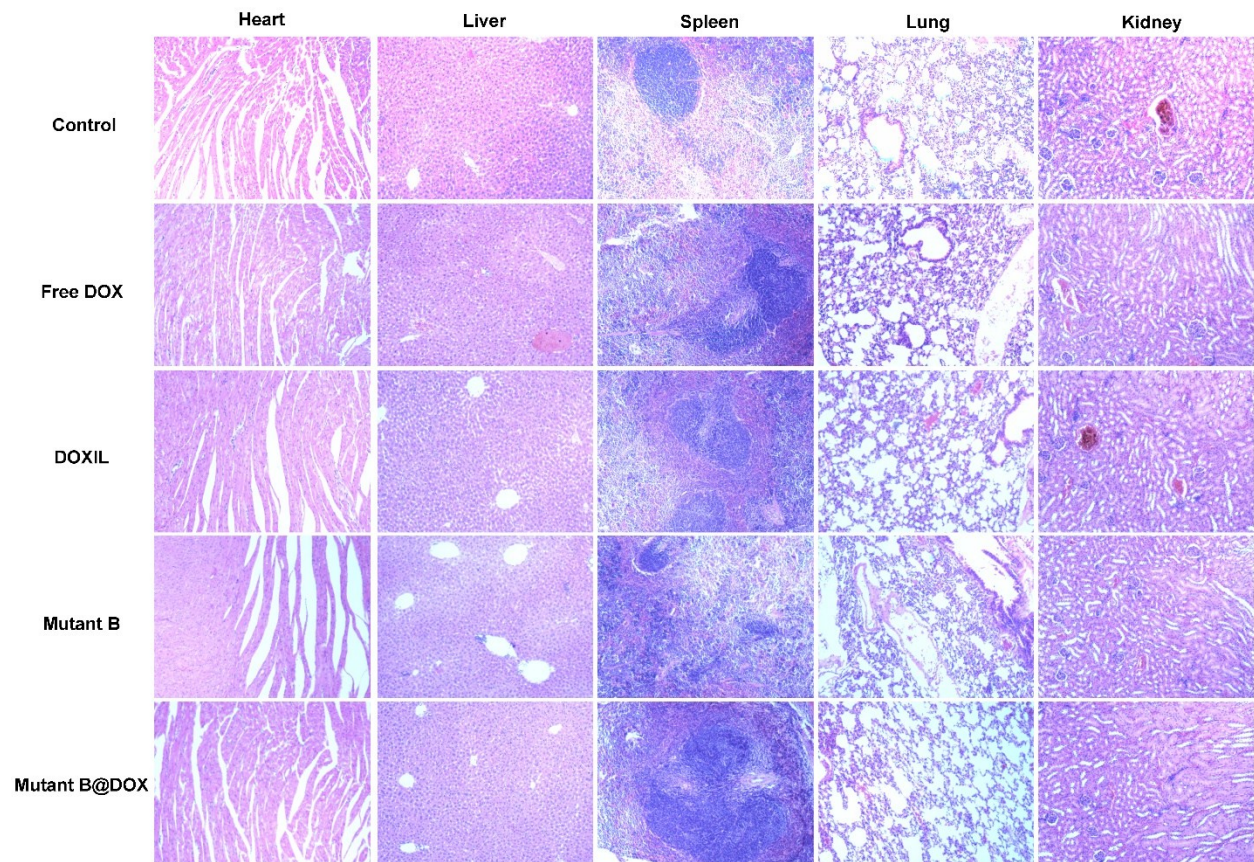

**Figure S9.** H&E stained imaging of main organs from various treatment groups.
